# Supplementary material
Source: PubMed Central journal article supplement (PMC2953888)

## Materials

Cholesterol (Chol) and DSPE-PEG-maleimide (DSPE-PEG-Mal) were purchased from Avanti Polar Lipids, Inc (Alabaster, AL). Methoxy-polyethylene glycol (MW=2000 Da)-distearoyl phosphatidylethanolamine (DSPE-PEG) and Egg phosphatidylcholine (egg PC) were obtained from Lipoid (Newark, NJ). 2-Iminothiolane (Traut's reagent), and other chemicals were purchased from Sigma Chemical Co. (St. Louis, MO).

## Preparation of immunoliposome

Briefly, lipids Chol:Egg-PC:PEG-DSPE (molar ratio = 33.5: 65: 1.5) were dissolved in ethanol and a thin lipid layer was formed under rotavapor. Lipids were rehydrated in PBS and particle size was reduced by high pressure extrusion with nuclear polycarbonate membranes (pore sizes: 0.2 and 0.1  $\mu$ m, Northern Lipids) as described previously.<sup>1</sup> Liposome size distribution was analyzed on a NICOMP Particle Sizer Model 370 (Particle Sizing Systems, Santa Barbara, CA). Volume weighted analysis showed particle size of approximate 100nm. A post-insertion method was adopted to incorporate antibody (milatuzumab) into preformed liposomes. In this method, milatuzumab was reacted with 10 $\times$  Traut's reagent in Phosphate-buffered saline (PBS) (pH 8.0) for 2 hr at room temperature to yield sulfhydryl (SH) modified antibodies. Separation of milatuzumab-SH from unreacted 2- iminothiolane was performed using Sephadex PD-10 desalting column, and eluted with PBS (pH 6.5). The milatuzumab-SH was added to Mal-PEG-DSPE at a ratio of 10:1 (Mal-PEG-DSPE:milatuzumab-SH), and coupled overnight at room temperature. This antibody mixture was then incubated with liposomes for 1 h at 37°C to form targeted ILP with antibody-to-lipid ratios of 1:1000. Non-coupled antibody was separated on a Sepharose CL-4B column using PBS (pH 7.4). All liposomal suspensions were filtered through 0.22  $\mu$ m PES syringe filters to ensure sterility and milatuzumab-ILP was stored at 4°C.

## REFERENCE

1. Sapra P, Allen TM. Internalizing antibodies are necessary for improved therapeutic efficacy of antibody-targeted liposomal drugs. *Cancer Res.* Dec 15 2002;62(24):7190–7194.

**Table S1. Patient characteristics**

| <b>ID#</b>   | <b>IgVH</b> | <b>del17p</b> | <b>Rai stage</b> | <b>Previous treatments</b>                                                                 | <b>Flud resistant</b> |
|--------------|-------------|---------------|------------------|--------------------------------------------------------------------------------------------|-----------------------|
| <b>CLL1</b>  | unmutated   | no            | 0                | Fludarabine (6 cycles, 2001), FCR (2004)                                                   | No                    |
| <b>CLL2</b>  | mutated     | no            | III              | no treatment to date                                                                       | N/A                   |
| <b>CLL3</b>  | mutated     | yes           | III              | no treatment to date                                                                       | N/A                   |
| <b>CLL4</b>  | unmutated   | yes           | IV               | Rituximab (2003, 2004, 2005, 2006)                                                         | N/A                   |
| <b>CLL5</b>  | mutated     | no            | I                | Fludarabine (2 cycles, 1998), Rituximab (2003)                                             | No                    |
| <b>CLL6</b>  | ND          | no            | I                | no treatment to date                                                                       | N/A                   |
| <b>CLL7</b>  | mutated     | no            | I                | no treatment to date                                                                       | N/A                   |
| <b>CLL8</b>  | unmutated   | no            | I                | no treatment to date (However, started FCR on 2/11/08)                                     | No                    |
| <b>CLL9</b>  | mutated     | no            | II               | no treatment to date                                                                       | N/A                   |
| <b>CLL10</b> | ND          | no            | IV               | no treatment to date                                                                       | N/A                   |
| <b>CLL11</b> | unmutated   | no            | 0                | no treatment to date                                                                       | N/A                   |
| <b>CLL12</b> | ND          | no            | I                | Rituximab (2009)                                                                           | N/A                   |
| <b>CLL13</b> | ND          | no            | I                | no treatment to date                                                                       | N/A                   |
| <b>CLL14</b> | unmutated   | no            | I                | no treatment to date (for CLL)- started on CALGC 10404 shortly after (FR followed by lina) | N/A                   |
| <b>CLL15</b> | unmutated   | no            | III              | no treatment to date                                                                       | N/A                   |
| <b>CLL16</b> | unmutated   | no            | 0                | no treatment to date                                                                       | N/A                   |
| <b>CLL17</b> | unmutated   | no            | III              | no treatment to date                                                                       | N/A                   |
| <b>CLL18</b> | ND          | no            | I                | no treatment to date                                                                       | N/A                   |
| <b>CLL19</b> | unmutated   | no            | IV               | no treatment to date                                                                       | N/A                   |
| <b>CLL20</b> | ND          | no            | I                | Fludarabine & Ritux (2003)                                                                 | No                    |
| <b>CLL21</b> | unmutated   | no            | III              | Fludarabine (2002) Ritux (2003), CHOP (2009)                                               | No                    |
| <b>CLL22</b> | mutated     | no            | 0                | no treatment to date                                                                       | N/A                   |
| <b>CLL23</b> | mutated     | no            | I                | Leukeran (2007)                                                                            | N/A                   |
| <b>CLL24</b> | mutated     | no            | IV               | Chlorambucil (1991-92, 1994, 1997), Fludarabine (2002), FR (05-06)                         | No                    |
| <b>CLL25</b> | unmutated   | no            | I                | FR (2006-2007)                                                                             | No                    |
| <b>CLL26</b> | unmutated   | no            | II               | FR (2005), PCR (2007), PCR (2008) Bendamustine & Ritux (2009) Solu-medrol & Ritux (2010)   | No                    |
| <b>CLL27</b> | mutated     | no            | 0                | no treatment to date                                                                       | N/A                   |
| <b>CLL28</b> | unmutated   | no            | I                | no treatment to date                                                                       | N/A                   |
| <b>CLL29</b> | ND          | no            | I                | no treatment to date                                                                       | N/A                   |
| <b>CLL30</b> | unmutated   | no            | IV               | no treatment to date (started FR on 3/29/10)                                               | N/A                   |

**Figure S1. Milatuzumab induces apoptosis in CLL cells**

MTT (3-[4,5-Dimethylthiazol-2-yl]-2,5-diphenyl-tetrazolium bromide) assays were performed to determine a decrease in mitochondrial enzyme function (indicating cell death). One  $\times 10^6$  CD19-selected B-cells from CLL patients were incubated for 48 hours with anti-Fc crosslinking antibody, 5  $\mu$ g/mL milatuzumab alone or the indicated dose of milatuzumab with 5 times excess anti-Fc crosslinking antibody for 48 hours. Fludarabine (1  $\mu$ M) was used as a control to cell death. MTT reagent was then added, and plates were incubated for an additional 24 hours before spectrophotometric measurement.

**Figure S2. CLL cells aggregate in culture following milatuzumab + anti-Fc treatment**

Immunofluorescence staining (original magnification  $\times 40$ ) for CD74 in CLL patient cells either untreated, treated with 5  $\mu$ g/mL milatuzumab alone or 5  $\mu$ g/mL milatuzumab + 25  $\mu$ g/mL anti-Fc crosslinking antibody for 48 hours. DAPI is used as a nuclear stain.

**Figure S3. Soluble anti-Fc is required for milatuzumab induced CLL cell death**

Viability by PI staining of CLL patient cells either untreated, treated with anti-Fc alone, 5  $\mu$ g/mL milatuzumab, milatuzumab immobilized on a cell culture plate or milatuzumab + 25  $\mu$ g/mL anti-Fc crosslinking antibody for 12, 24 and 48 hours. (N = 6;  $P < .0001$  milatuzumab + anti-Fc vs. immobilized milatuzumab, averaged across all time points).

**Figure S1 – Viability of CLL cells determined by MTT assay**

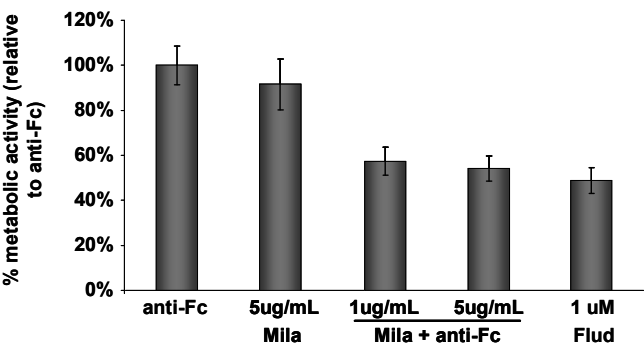

**Figure S2 – CLL cells aggregate following milatuzumab + anti-Fc treatment**

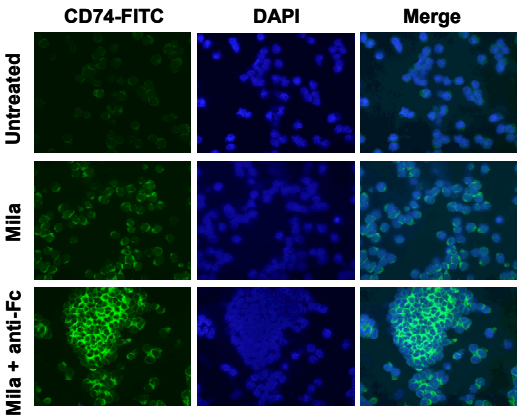

**Figure S3 – Soluble anti-Fc is required for milatuzumab induced CLL cell death**

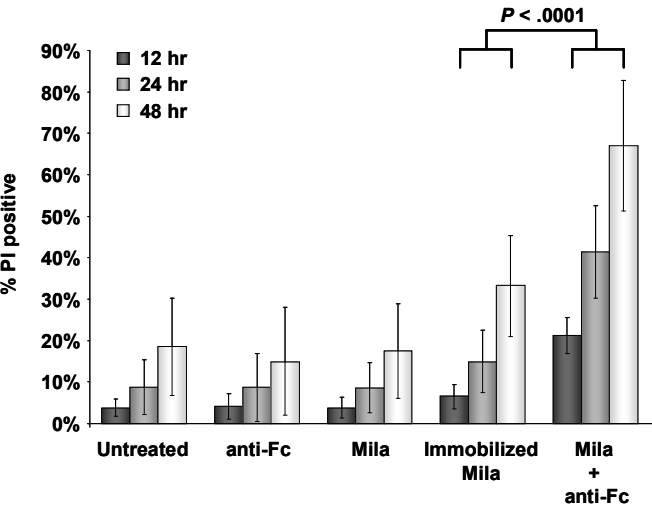

Supplement: blood-2009-11-253203_1.pdf [file blood-2009-11-253203_1.pdf]
